# Supplementary material
Source: PubMed Central journal article supplement (PMC2656177)
Supplement: 0810427106_0810427106SI.pdf [file 0810427106_0810427106SI.pdf]

# Supporting Information

Parish et al. 10.1073/pnas.0810427106

## Media Control

H&E

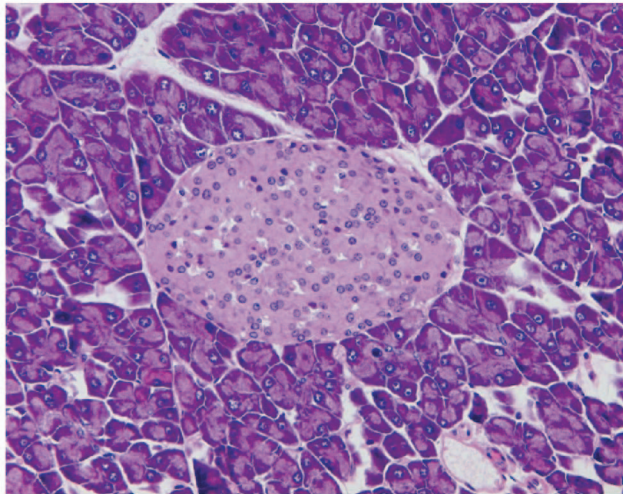

GAF

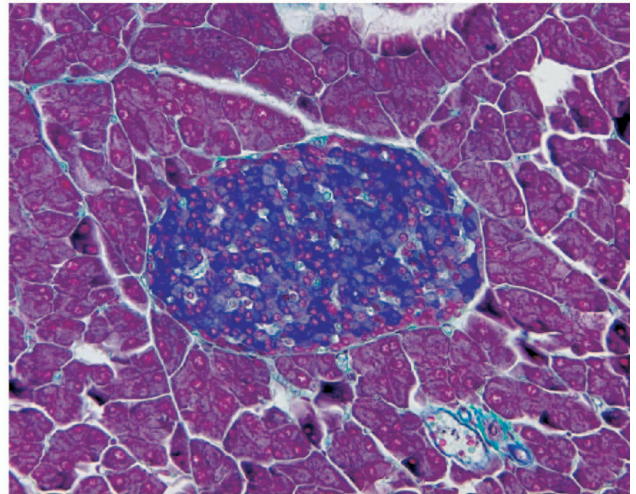

## 0.22 x 10<sup>6</sup> CTL

H&E

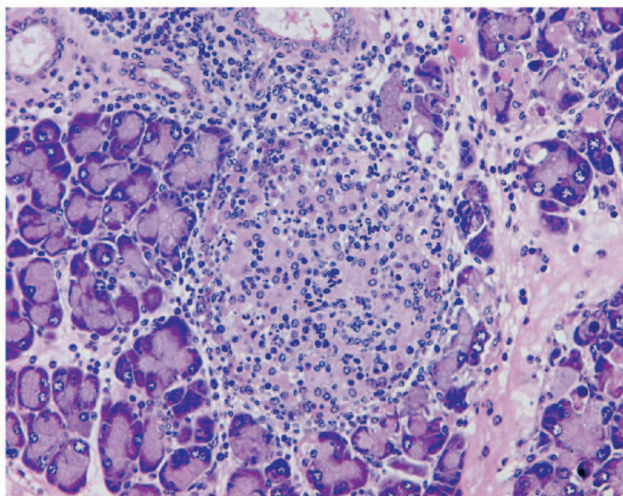

GAF

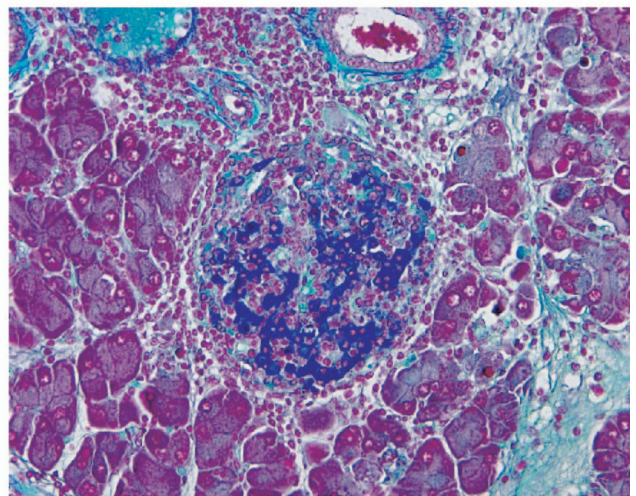

**Fig. S1.** Low CTL doses induce histologically detectable islet disruption. RIP-OVA<sup>lo</sup> mice were given either media alone (*Upper*) or 220,000 CTLs (*Lower*). Four or 7 days later pancreases were harvested from each mouse, fixed, and sectioned. The tissue sections were stained with either hematoxylin and eosin (H&E) to visualize tissue architecture and infiltrates or Gomori's Aldehyde Fuchsin (GAF) to visualize islet cells (blue/dark purple). Representative data from 7 media- and 7 CTL-treated mice from 3 separate experiments are shown.

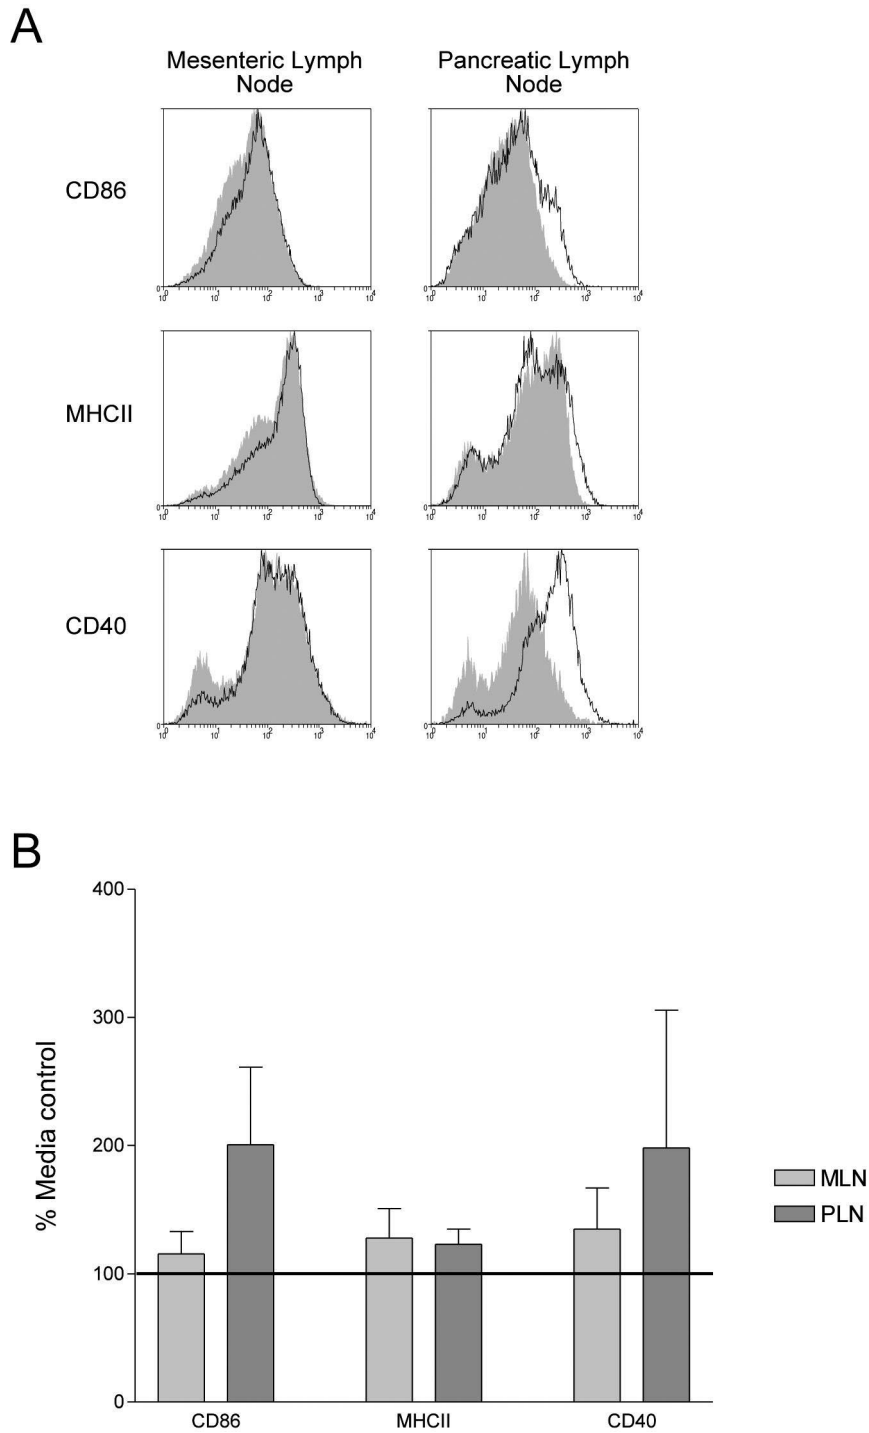

**Fig. S2.** CTL damage induces minimal DC maturation. The draining pancreatic or nondraining mesenteric lymph nodes were harvested from RIP-OVA<sup>lo</sup> mice given either media or 220,000 CTLs i.v. after which the lymph node cells were enriched for dendritic cells and phenotyped by flow cytometry. (A) Plots show the staining of CD11c<sup>+</sup> cells from media- (shaded histogram) or CTL-treated (open histogram) mice. Representative plots from 1 of 4 independent experiments are shown. (B) The data from A displayed as a bar graph with pooled data from the 4 experiments. Data were normalized before pooling by expressing each mean fluorescence index as a percentage of the media control value for that lymph node (represented as percentage of media control on the graph). None of the observed shifts were statistically significant. Error bars represent the standard deviation. MLN, mesenteric lymph node; PLN, pancreatic lymph node.



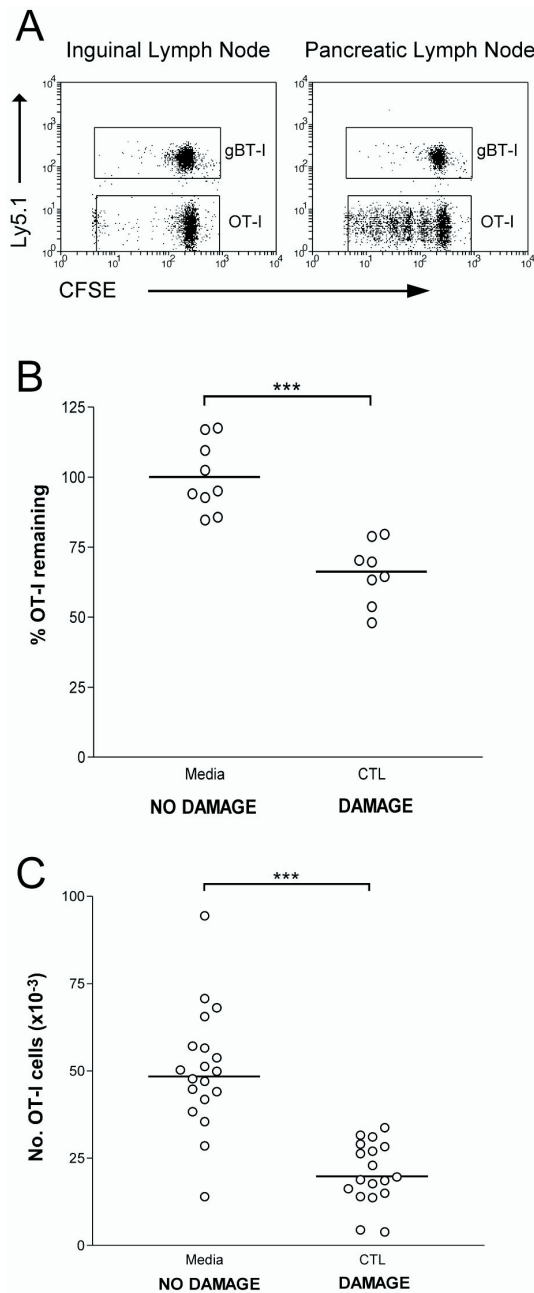

**Fig. S4.** OT-I deletion is antigen specific and is augmented by reducing initial naive T cell numbers. (A) RIP-OVA<sup>lo</sup> mice were given 220,000 CTLs i.v. and 4 days later were injected i.v. with 2 million CFSE-labeled Ly5.2<sup>+</sup> OT-I cells and 2 million CFSE-labeled Ly5.1<sup>+</sup> gBT-I cells. Proliferation was examined by flow cytometry of draining pancreatic and nondraining inguinal lymph node cells 60 h later. Representative data from 3 independent experiments are shown. (B) RIP-OVA<sup>lo</sup> mice were given either media or 220,000 Ly5.2<sup>+</sup> CTLs i.v. and 4 days later were injected i.v. with 5 million Ly5.1<sup>+</sup> naive OT-I cells and 5 million Ly5.1<sup>+</sup> naive gBT-I cells. Four weeks after naive T cell injection, the number of Ly5.1<sup>+</sup> V $\beta$ 8.1/8.2<sup>-</sup> (OT-I) cells and Ly5.1<sup>+</sup> V $\beta$ 8.1/8.2<sup>+</sup> (gBT-I) cells remaining in the spleen and lymph nodes of the mice was determined by flow cytometry. *y*-axis values display the number of remaining OT-I cells divided by the number of gBT-I cells and multiplied by 100. Thus, the number of OT-I cells remaining is expressed as a percentage of the gBT-I cells remaining and overall this gives the survival of OT-I cells relative to gBT-I cells. To pool data from 2 independent experiments, final values were normalized such that the media control group's average was 100%. Circles represent individual mice and the bar represents the average. \*\*\*,  $P < 0.001$ . Pooled data from 2 independent experiments are shown. (C) RIP-OVA<sup>lo</sup> mice were given either media (NO DAMAGE) or 220,000 Ly5.1<sup>+</sup> CTL (DAMAGE) i.v. followed by 1 million Ly5.2<sup>+</sup> naive OT-I cells i.v. 4 days later. Four weeks after naive OT-I injection, the number of Ly5.1<sup>-</sup> OVA-tetramer<sup>+</sup> cells (derived from the original naive Ly5.2<sup>+</sup> OT-I cells) remaining in the spleen and lymph nodes of the mice was determined by flow cytometry. Pooled data are shown from 2 independent experiments.
